# Supplementary material
Source: PubMed Central journal article supplement (PMC8006468)
Supplement: NIHMS1672004-supplement-supplementary_material.pdf [file NIHMS1672004-supplement-supplementary_material.pdf]

## Supporting Information

### Assessment of NR4A Ligands that Directly Bind and Modulate the Orphan Nuclear Receptor Nurr1

Paola Munoz-Tello <sup>†</sup>, Hua Lin <sup>‡,¶</sup>, Pasha Khan <sup>‡</sup>, Ian Mitchell S. de Vera <sup>†,§</sup>, Theodore M. Kamenecka <sup>‡</sup>, and Douglas J. Kojetin <sup>†,‡,\*</sup>

<sup>†</sup> Department of Integrative Structural and Computational Biology, The Scripps Research Institute, Jupiter, FL, 33458, USA

<sup>‡</sup> Department of Molecular Medicine, The Scripps Research Institute, Jupiter, Florida 33458, USA

<sup>¶</sup> Current address: Biomedical Research Center of South China, College of Life Sciences, Fujian Normal University, Fuzhou 350117, China

<sup>§</sup> Current address: Department of Pharmacology and Physiology, Saint Louis University School of Medicine, St. Louis, MO 63104, USA

\* Correspondence: Douglas J. Kojetin, mail: [dkojetin@scripps.edu](mailto:dkojetin@scripps.edu)

#### Pages

S1: title page

S2: HPLC purity for 1 (SR10098)

S3: HPLC purity for 2 (SR24237)

S4: HPLC purity for 3 (SR10658)

S5: Vendor certificate of analysis, amodiaquine

S6: Vendor certificate of analysis, C-DIM12

S7-8: Vendor certificate of analysis, camptothecin

S9-10: Vendor certificate of analysis, celastrol

S11-12: Vendor certificate of analysis, chloroquine

S13-14: Vendor certificate of analysis, cytosporone B

S15-16: Vendor certificate of analysis, IP7e

S17-18: Vendor certificate of analysis, isoalantolactone

S19: Vendor certificate of analysis, TMPA

S20: Figure S1

S21: Figure S2

S22: Figure S3

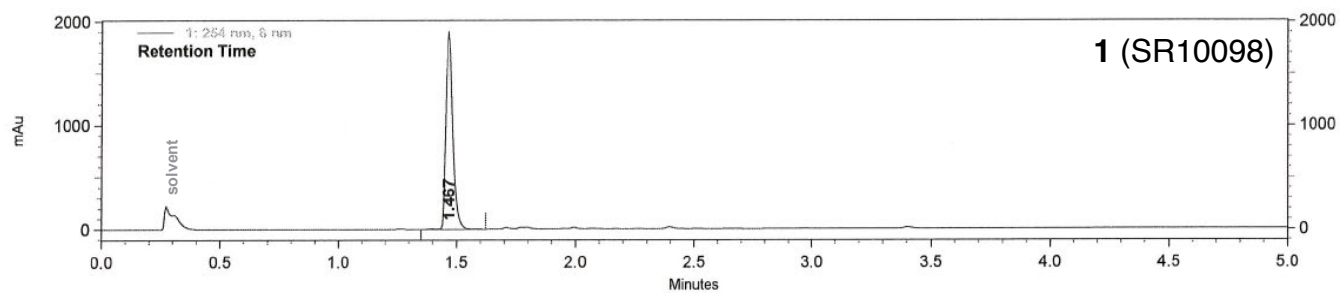**PDA-254 nm****Results**

| Retention Time | Area           | Area %        | Height         | Height %      |
|----------------|----------------|---------------|----------------|---------------|
| 1.467          | 3923198        | 100.00        | 1900623        | 100.00        |
| <b>Totals</b>  | <b>3923198</b> | <b>100.00</b> | <b>1900623</b> | <b>100.00</b> |

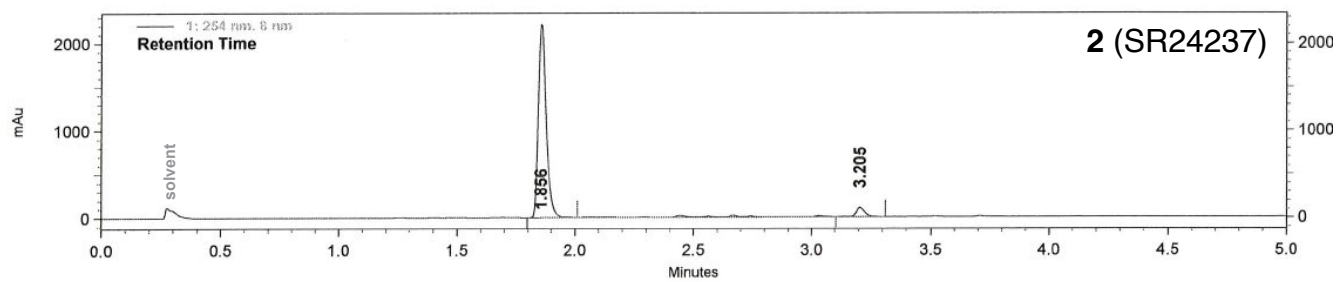**PDA-254 nm****Results**

| Retention Time | Area           | Area %        | Height         | Height %      |
|----------------|----------------|---------------|----------------|---------------|
| 1.856          | 5019377        | 95.81         | 2199525        | 95.30         |
| 3.205          | 219639         | 4.19          | 108449         | 4.70          |
| <b>Totals</b>  | <b>5239016</b> | <b>100.00</b> | <b>2307974</b> | <b>100.00</b> |

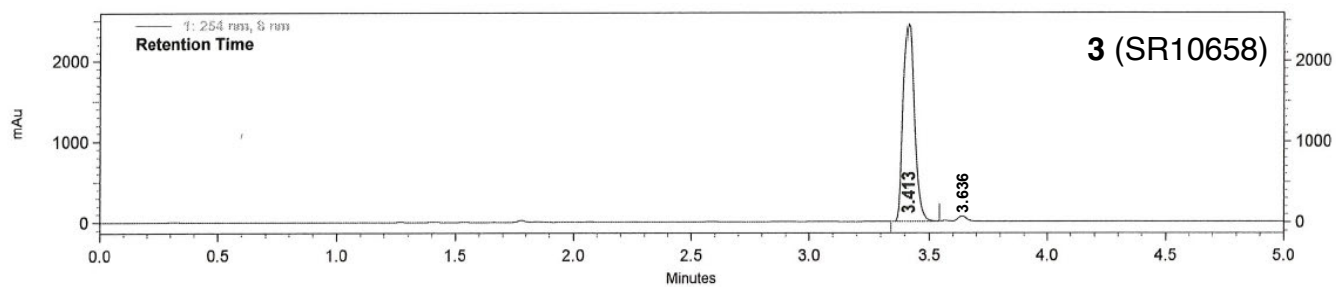**PDA-254 nm****Results**

| Retention Time | Area    | Area % | Height  | Height % |
|----------------|---------|--------|---------|----------|
| 3.413          | 7301453 | 98.42  | 2405941 | 97.62    |
| 3.637          | 117225  | 1.58   | 58633   | 2.38     |

|        |         |        |         |        |
|--------|---------|--------|---------|--------|
| Totals | 7418678 | 100.00 | 2464574 | 100.00 |
|--------|---------|--------|---------|--------|

## Product Information Sheet

### Amodiaquine dihydrochloride dihydrate

Catalogue Number: CYP526  
 Amount: 5 g  
 Molecular formula:  $C_{20}H_{22}ClN_3O \cdot 2HCl \cdot 2H_2O$   
 Molecular weight: 464.8  
 Storage: Store at ambient temperature. Keep tightly closed.  
 Intended Use: For laboratory (research) purposes only. Not for drug or human use.

Structure:

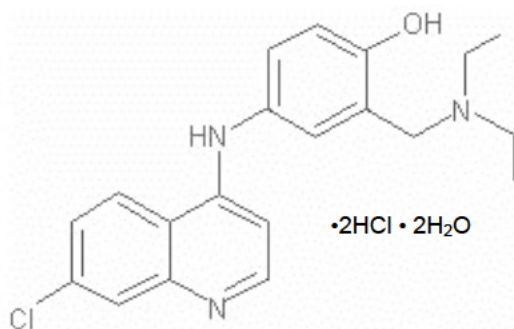

Batch Number: 6712012008  
 IR Spectrum: Conforms  
 UV Spectrum: Conforms  
 Purity: 99.65 %  
 Analysis date: December 2006

Approved by \_\_\_\_\_

Date 12<sup>th</sup> November, 2007

#### Safety Data

The toxicological properties of this reagent have not been investigated. Exercise due care when handling.

#### IMPORTANT DISCLAIMER

1. Products supplied by Cypex may be harmful if misused. Any product ordered from Cypex must not be used for any purpose other than the intended use specified on the Product Information Sheet which accompanies the product when delivered. Please ensure that products supplied by Cypex are used safely, and, in particular, that the products do not come into direct human contact.
2. Cypex undertakes that all products supplied by it shall conform to the specification appearing on the Product Information Sheet which accompanies the product when delivered. In the event that products supplied by Cypex fail to meet such specification, Cypex will supply replacement products free of charge provided that the defective products have been returned to Cypex within a reasonable time of delivery (Cypex will reimburse reasonable costs incurred in returning defective products), and this shall be the only remedy available in respect of the supply of any defective products.
3. Cypex gives no undertakings or warranties in respect of products supplied other than the undertaking given at 2, above. Furthermore, Cypex has given and gives no undertaking or warranty nor does it make any representation, directly or indirectly, express or implied, about the quality, character or suitability of products supplied by Cypex.
4. Cypex shall have no liability in respect of loss or damage (whether direct or indirect or in the nature of loss of profit) suffered as a result of the supply of products by Cypex, or the subsequent use, storage or other application of the products, whether or not the products meet the specification referred to at 2, above.

3050 Spruce Street, Saint Louis, MO 63103, USA

Website: www.sigma-aldrich.com

Email USA: techserv@sigma.com

Outside USA: eurtechserv@sigma.com

# Certificate of Analysis

**Product Name :** C-DIM12 ≥98% (HPLC)  
**Product Number :** SML1508-25MG  
**Batch Number :** 0000043274  
**Source Batch :** 0000033598  
**CAS Number :** 178946-89-9  
**Storage Temperature :** Cooler/Refrigerated  
**Molecular Formula :** C<sub>23</sub>H<sub>17</sub>N<sub>2</sub>Cl  
**Formula Weight :** 356.85

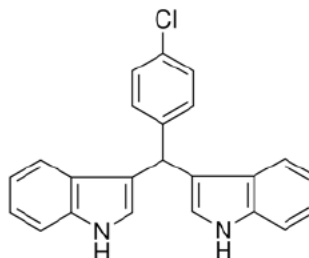

| Test                     | Specification            | Result      |
|--------------------------|--------------------------|-------------|
| Appearance (Color)       | Light Orange to Dark Red | Orange Red  |
| Appearance (Form)        | Powder                   | Powder      |
| Subsidiarity (Turbidity) | Clear                    | Clear       |
| Subsidiarity (Color)     | Conforms to Requirements | Dark Yellow |
| Concentration            | ≥ 20.0 mg/m              | 40.0 mg/m   |
| DMSO                     |                          |             |
| Purity (HPLC)            | ≥ 97.5 %                 | 99.9 %      |
| Identity                 | Confirmed                | Confirmed   |
| Water Content            | 0.0 - 2.0 mo             | 0.2 mo      |
| Elemental Composition    | Pass                     | Pass        |

Sigma-Aldrich warrants, that at the time of the quality release or subsequent retest date this product conformed to the information contained in this publication. The current Specification sheet may be available at Sigma-Aldrich.com. For further inquiries, please contact Technical Service. Purchase must determine the suitability of the product for its particular use. See reverse side of website or packaging slip for additional terms and conditions of sale.

# PRODUCT INFORMATION

## Camptothecin

Item No. 11694

**CAS Registry No.:** 7689-03-4  
**Formal Name:** (4S)-4-ethoxy-4-hydroxy-1H-pyrano[3',4':6,7]indole no[1,2-b]quinoline-3,14(4H,12H)-dione  
**Synonyms:** MAG-CPT, NSC 94600  
**MF:** C<sub>20</sub>H<sub>16</sub>N<sub>2</sub>O<sub>4</sub>  
**FW:** 348.4  
**Purity:** ≥98%  
**Stability:** ≥2 years at -20°C  
**Supplied as:** A crystalline solid  
**UV/Vis.:** λ<sub>max</sub>: 218, 253, 289, 359 nm

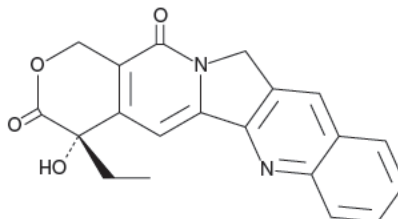

### Laboratory Procedures

For long term storage, we suggest that camptothecin be stored as supplied at -20°C. It should be stable for at least two years.

Camptothecin is supplied as a crystalline solid. A stock solution may be made by dissolving the camptothecin in the solvent of choice. Camptothecin is soluble in organic solvents such as DMSO and dimethylformamide, which should be purged with an inert gas. The solubility of camptothecin in these solvents is approximately 3 and 2 mg/ml, respectively.

Camptothecin is sparingly soluble in aqueous buffers. For maximum solubility in aqueous buffers, camptothecin should first be dissolved in DMSO and then diluted with the aqueous buffer of choice. Camptothecin has a solubility of approximately 0.25 mg/ml in a 1:3 solution of DMSO:PBS (pH 7.2) using this method. We do not recommend storing the aqueous solution for more than one day.

### Description

DNA topoisomerases are DNA torsion strains created during replication, transcription, recombination, repair, and chromosome condensation. The relaxation of DNA supercoiling by topoisomerase I at single-strand breaks enables anticancer agents to reversibly trap the complex by intercalating between DNA base pairs at the cleavage site, thus inhibiting recombination, which activates apoptotic and cell cycle arrest pathways.<sup>1</sup> Camptothecin is a cytotoxic quinoline alkaloid, discovered as the active principle of extracts from the Chinese tree *C. acuminata*, that inhibits the DNA enzyme topoisomerase I (Top1). It binds the Top1-DNA cleavage complex, inducing DNA-strand breaks.<sup>2,3</sup> Camptothecin has strong antitumor activity against a wide range of experimental tumors and inhibits both DNA and RNA synthesis in mammalian cells.<sup>4</sup> It displays cytotoxicity in HT-29 cells with an IC<sub>50</sub> value of 10 nM and induces DNA damage at concentrations as low as 51 nM in whole cells and 12 nM in isolated nuclei *in vitro* assays.<sup>5</sup>

### References

1. Drwa, M.N., Agama, K., Wake, L.P.G., et al. *PLoS One* **6**(9), 1-12 (2011).
2. Hsiao, Y.-H., Hertzberg, R., Hecht, S., et al. *J. Biol. Chem.* **260**(27), 14873-14878 (1985).
3. Marchand, C., Antony, S., Kohn, K.W., et al. *Mol. Cancer Ther.* **5**(2), 287-295 (2006).
4. Dancey, J. and Eisenhauer, E.A. *Br. J. Cancer* **74**, 327-338 (1996).
5. Rothenberg, M.L. *Ann. Oncol.* **8**(9), 837-855 (1997).

**WARNING**  
 THIS PRODUCT IS FOR RESEARCH ONLY. NOT FOR HUMAN OR VETERINARY DIAGNOSTIC OR THERAPEUTIC USE.

**SAFETY DATA**  
 This material should be considered hazardous until further information becomes available. Do not ingest, inhale, get in eyes, on skin, or on clothing. Wash thoroughly after handling. Before use, the user must review the [Complete Safety Data Sheet](#), which has been sent via email to your institution.

**WARRANTY AND LIMITATION OF REMEDY**  
 Buyer agrees to purchase the material subject to Cayman's Terms and Conditions. Complete Terms and Conditions including Warranty and Limitation of Remedies can be found on our website.

Copyright Cayman Chemical Company, 02/24/2016

### CAYMAN CHEMICAL

1180 EAST ELLSWORTH RD  
 ANN ARBOR, MI 48108 USA

**PHONE:** 800] 364-9897  
 734] 971-3335

**FAX:** 734] 971-3640

CUSTOMER SERVICE: RV@CAYMANCHEMICAL.COM  
 WWW.CAYMANCHEMICAL.COM

# CERTIFICATE of ANALYSIS

Purity Specification:  $\geq 98\%$   
 Molecular Formula : C<sub>20</sub>H<sub>16</sub>N<sub>2</sub>O<sub>4</sub>  
 CAS Number: 7689-03-4

Formula Weight : 348.4

Expiry date: 7/17/2021

|           |                                      |
|-----------|--------------------------------------|
| HPLC      | Purity: 99.1 %                       |
| Mass spec | MH+: 349.1                           |
| TLC       | Purity: 100 %                        |
| UV        | $\lambda$ max: 219, 253, 289, 362 nm |

*Gen Fabrique*

**WARNING**  
 THIS PRODUCT IS FOR RESEARCH ONLY - NOT FOR HUMAN OR VETERINARY DIAGNOSTIC OR THERAPEUTIC USE.

**SAFETY DATA**  
 This material should be considered hazardous until further information becomes available. Do not ingest, inhale, get in eyes, on skin, or on clothing. Wash thoroughly after handling. Before use, the user must review the complete Safety Data Sheet, which has been sent via email to your institution.

**WARRANTY AND LIMITATION OF REMEDY**  
 Buyer agrees to purchase the material subject to Cayman's Terms and Conditions. Complete Terms and Conditions including Warranty and Limitation of Liability information can be found on our website.

Copyright Cayman Chemical Company

## CAYMAN CHEMICAL

1180 EAST ELLSWORTH RD  
 ANN ARBOR, MI 48108 · USA

**PHONE:** [800] 364-9897

[734] 971-3335

**FAX:** [734] 971-3640

CUSTSERV@CAYMANCHEM.COM

WWW.CAYMANCHEM.COM



# PRODUCT INFORMATION

## Celastrol

Item No. 70950

CAS Registry No.: 34157-83-0  
 Formal Name: 3-hydroxy-9 $\beta$ ,13 $\alpha$ -dimethyl-2-oxo-24,25,26-trinorbornane-1(10),3,5,7-tetraene-29-oic acid  
 MF: C<sub>29</sub>H<sub>38</sub>O<sub>4</sub>  
 FW: 450.6  
 Purity:  $\geq$ 98%  
 Stability:  $\geq$ 2 years at -20°C  
 Supplied as: A crystalline solid  
 UV/Vis.:  $\lambda_{\text{max}}$ : 253, 424 nm

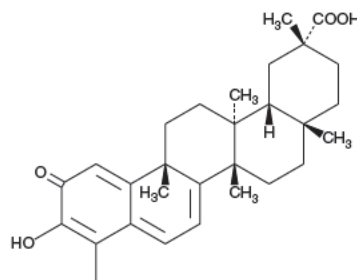

### Laboratory Procedures

For long term storage, we suggest that celastrol be stored as supplied at -20°C. It should be stable for at least two years.

Celastrol is supplied as a crystalline solid. A stock solution may be made by dissolving the celastrol in an organic solvent purged with an inert gas. Celastrol is soluble in organic solvents such as ethanol, DMSO, and dimethylformamide (DMF). The solubility of celastrol in these solvents is approximately 10 mg/ml in ethanol and DMSO and 20 mg/ml in DMF.

Celastrol is sparingly soluble in aqueous buffers. For maximum solubility in aqueous buffers, celastrol should first be dissolved in DMF and then diluted with the aqueous buffer of choice. Celastrol has a solubility of approximately 1 mg/ml in a 1:10 solution of DMF:PBS (pH 7.2) using this method. We do not recommend storing the aqueous solution for more than one day.

### Description

A variety of natural products from plant sources, particularly flavonoids, have long been observed to have antioxidant activity with potent benefits for human health.<sup>1-3</sup> Antioxidant terpenes are less common. Celastrol is a triterpenoid antioxidant compound isolated from Chinese thunder god vine (*T. wilfordii*). In an isolated rat liver assay of lipid peroxidation, celastrol had an IC<sub>50</sub> value of 7  $\mu$ M, equivalent to about 15 times the antioxidant potency of  $\alpha$ -tocopherol.<sup>4</sup>

### References

- Frémont, L., Be guendouz, L., and De pa, S. Antioxidant activity of resveratrol and a coho-free wine polyphenols related to LDL oxidation and polyunsaturated fatty acids. *Life Sci.* **64**, 2511-2521 (1999).
- Johnson, J.L. and Maddipati, K.R. Paradoxical effects of resveratrol on the two prostaglandin synthases. *Prostaglandins and Other Lipid Mediators* **56**, 131-143 (1998).
- Miller, N.J. and Rice-Evans, C. Antioxidant activity of resveratrol in red wine. *Clin. Chem.* **41**, 1789 (1995).
- Sassa, H., Takashima, Y., and Terada, H. The triterpene celastrol as a very potent inhibitor of lipid peroxidation in mitochondria. *Biochem. Biophys. Res. Commun.* **172(2)**, 890-897 (1990).

#### WARNING

THIS PRODUCT IS FOR RESEARCH ONLY. NOT FOR HUMAN OR VETERINARY DIAGNOSTIC OR THERAPEUTIC USE.

#### SAFETY DATA

This material should be considered hazardous until further information becomes available. Do not ingest, inhale, get in eyes, on skin, or on clothing. Wash thoroughly after handling. Before use, the user must review the complete Safety Data Sheet, which has been sent via email to your institution.

#### WARRANTY AND LIMITATION OF REMEDY

Buyer agrees to purchase this material subject to Cayman's Terms and Conditions. Complete Terms and Conditions including Warranty and Limitation of Liability in information can be found on our website.

Copyright Cayman Chemical Company, 03/22/2016

#### CAYMAN CHEMICAL

1180 EAST ELLSWORTH RD

ANN ARBOR, MI 48108 USA

PHONE: 800] 364-9897

734] 971-3335

FAX: 734] 971-3640

CUSTOMERS: RV@CAYMANCHEM.COM

WWW.CAYMANCHEM.COM

S10

# CERTIFICATE of ANALYSIS

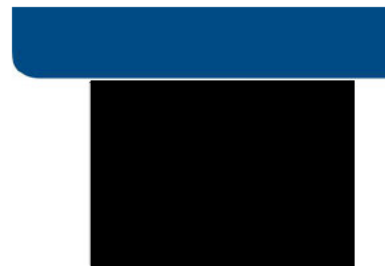

.....  
.....  
.....

Purity Specification:  $\geq 98\%$   
Molecular Formula : C<sub>29</sub>H<sub>38</sub>O<sub>4</sub>  
CAS Number: 34157-83-0

Formula Weight : 450.6

Expiry date: 8/16/2018

.....

|           |                            |
|-----------|----------------------------|
| Mass spec | M-H <sup>+</sup> : 449.8   |
| TLC       | Purity: 100 %              |
| UV        | $\lambda$ max: 247, 423 nm |

.....  
*Jibby Perry*

**WARNING**  
THIS PRODUCT IS FOR RESEARCH ONLY - NOT FOR HUMAN OR VETERINARY DIAGNOSTIC OR THERAPEUTIC USE.

**SAFETY DATA**  
This material should be considered hazardous until further information becomes available. Do not ingest, inhale, get in eyes, on skin, or on clothing. Wash thoroughly after handling. Before use, the user must review the complete Safety Data Sheet, which has been sent via email to your institution.

**WARRANTY AND LIMITATION OF REMEDY**  
Buyer agrees to purchase the material subject to Cayman's Terms and Conditions. Complete Terms and Conditions including Warranty and Limitation of Liability information can be found on our website.

Copyright Cayman Chemical Company

## CAYMAN CHEMICAL

1180 EAST ELLSWORTH RD  
ANN ARBOR, MI 48108 · USA

**PHONE:** [800] 364-9897  
[734] 971-3335

**FAX:** [734] 971-3640  
CUSTSERV@CAYMANCHEM.COM  
WWW.CAYMANCHEM.COM

# Chem-Impex International, Inc.

**Tel:** (630) 766-2112

**E-mail:** sales@chemimpex.com

**Shipping and Correspondence:**

935 Dillon Drive

Wood Dale, IL 60191

**Fax:** (630) 766-2218

**Web site:** www.chemimpex.com

**Manufacturing site:**

825 Dillon Drive

Wood Dale, IL 60191

## Product Specifications

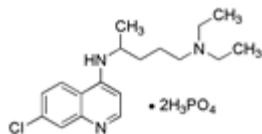

|                          |                                                                                   |
|--------------------------|-----------------------------------------------------------------------------------|
| <b>Catalogue Number</b>  | 22113                                                                             |
| <b>Product</b>           | <b>Chloroquine diphosphate salt</b>                                               |
| <b>CAS Number</b>        | 50-63-5                                                                           |
| <b>Molecular Formula</b> | C <sub>18</sub> H <sub>26</sub> ClN <sub>3</sub> •2H <sub>3</sub> PO <sub>4</sub> |
| <b>Molecular Weight</b>  | 515.86                                                                            |

|                                    |                                                                                            |
|------------------------------------|--------------------------------------------------------------------------------------------|
| <b>Appearance</b>                  | White or almost white crystalline powder                                                   |
| <b>Appearance of Solution</b>      | ≤ BY5 or GY5                                                                               |
| <b>Solubility</b>                  | Comply with test                                                                           |
| <b>Melting Point</b>               | ~ 195 °C                                                                                   |
| <b>Heavy Metals</b>                | ≤ 20 ppm                                                                                   |
| <b>Water Content (Karl Fisher)</b> | ≤ 2%                                                                                       |
| <b>pH</b>                          | 3.8 - 4.3                                                                                  |
| <b>Infrared Spectrum</b>           | Conforms to structure                                                                      |
| <b>Related Substances</b>          | One spot : ≤ 1%<br>Any other spot : ≤ 0.5%                                                 |
| <b>Assay by titration</b>          | 98.5 - 101.0%                                                                              |
| <b>Purity by UV</b>                | Conforms                                                                                   |
| <b>Grade</b>                       | BP                                                                                         |
| <b>Storage</b>                     | Store at 0 - 8 °C                                                                          |
| <b>Additional Information</b>      | Identification : Picric acid precipitate, test for phosphates should comply the standards. |

**For Laboratory Use Only**

# *Chem-Impex International, Inc.*

---

**Tel:** (630) 766-2112

**E-mail:** sales@chemimpex.com

**Shipping and Correspondence:**

935 Dillon Drive

Wood Dale, IL 60191

**Fax:** (630) 766-2218

**Web site:** www.chemimpex.com

**Manufacturing site:**

825 Dillon Drive

Wood Dale, IL 60191

---

## *Certificate of Analysis*

|                          |                                                                                                                      |
|--------------------------|----------------------------------------------------------------------------------------------------------------------|
| <b>Catalogue Number</b>  | 22113                                                                                                                |
| <b>Lot Number</b>        | 000052-20-027                                                                                                        |
| <b>Product</b>           | <b>Chloroquine diphosphate salt</b>                                                                                  |
|                          | N <sup>4</sup> -(7-Chloro-4-quinolinyl)-N <sup>1</sup> ,N <sup>1</sup> -dimethyl-1,4-pentanediamine diphosphate salt |
| <b>CAS Number</b>        | 50-63-5                                                                                                              |
| <b>Molecular Formula</b> | C <sub>18</sub> H <sub>26</sub> ClN <sub>3</sub> ·2H <sub>3</sub> PO <sub>4</sub>                                    |

---

|                           |                                                                                      |
|---------------------------|--------------------------------------------------------------------------------------|
| <b>Appearance</b>         | Solid                                                                                |
| <b>Assay by titration</b> | 99.0% (neutralization)                                                               |
| <b>Purity by HPLC</b>     | 98.6%                                                                                |
| <b>Storage</b>            | Store at 0-8°C                                                                       |
| <b>Remarks</b>            | See material safety data sheet for additional information<br>For laboratory use only |

**The foregoing is a copy of the Certificate of Analysis as provided by our supplier**



**Bala Kumar**  
**Quality Control Manager**

# Certificate of Analysis

[www.tocris.com](http://www.tocris.com)
**Product Name:** Cytosporone B**Catalog No.:** 5459**Batch No.:** 1

CAS Number: 321661-62-5

IUPAC Name: Ethyl 3,5-dihydroxy-2-(1-oxooctyl)-benzeneacetate

## 1. PHYSICAL AND CHEMICAL PROPERTIES

**Batch Molecular Formula:** C<sub>18</sub>H<sub>26</sub>O<sub>5</sub>  
**Batch Molecular Weight:** 322.4  
**Physical Appearance:** White solid  
**Solubility:** DMSO to 100 mM  
 ethanol to 100 mM  
**Storage:** Store at -20°C  
**Batch Molecular Structure:**

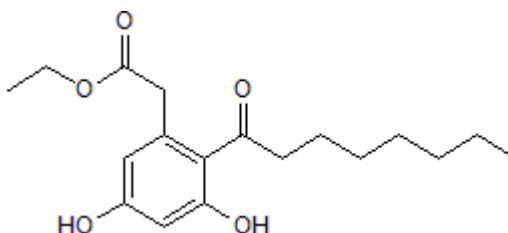

## 2. ANALYTICAL DATA

**TLC:** R<sub>f</sub> = 0.2 (Dichloromethane:Methanol [19:1])  
**HPLC:** Shows 99.5% purity  
**<sup>1</sup>H NMR:** Consistent with structure  
**Mass Spectrum:** Consistent with structure  
**Microanalysis:**

|             | Carbon | Hydrogen | Nitrogen |
|-------------|--------|----------|----------|
| Theoretical | 67.06  | 8.13     | 0        |
| Found       | 67.12  | 8.32     | 0.1      |

Caution - Not Fully Tested • Research Use Only • Not For Human or Veterinary Use

**bio-techne.com**  
 info@bio-techne.com  
 techsupport@bio-techne.com

**North America**  
 Tel: (800) 343 7475

**China**  
 info.cn@bio-techne.com  
 Tel: +86 (21) 52380373

**Europe Middle East Africa**  
 Tel: +44 (0)1235 529449

**Rest of World**  
 www.tocris.com/distributors  
 Tel: +1 612 379 2956

## Product Information

www.tocris.com

**Product Name:** Cytosporone B

**Catalog No.:** 5459

**Batch No.:** 1

CAS Number: 321661-62-5

IUPAC Name: Ethyl 3,5-dihydroxy-2-(1-oxooctyl)-benzeneacetate

### Description:

Naturally occurring Nur77 (NR4A1) agonist ( $K_d = 8.52 \times 10^{-7}$  M). Induces apoptosis in gastric cancer cells in vitro. Increases blood glucose levels in fasting C57 mice and suppresses xenograft tumor growth. Also exhibits a potent antifibrotic effect in bleomycin-induced skin fibrosis in vivo.

### Physical and Chemical Properties:

Batch Molecular Formula:  $C_{18}H_{26}O_5$

Batch Molecular Weight: 322.4

Physical Appearance: White solid

**Minimum Purity:** >98%

### Batch Molecular Structure:

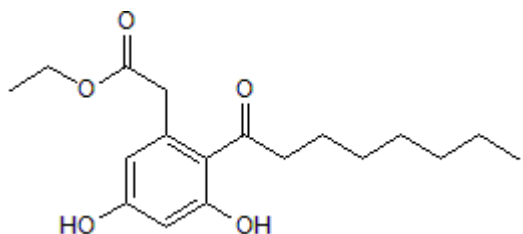

### References:

**Zhan *et al*** (2008) Cytosporone B is an agonist for nuclear orphan receptor Nur77. *Nat.Chem.Biol.* **4** 548. PMID: 18690216.

**Palumbo-Zerr *et al*** (2015) Orphan nuclear receptor NR4A1 regulates transforming growth factor- $\beta$  signaling and fibrosis. *Nat.Med.* **21** 150. PMID: 25581517.

**Storage:** Store at -20°C

### Solubility & Usage Info:

DMSO to 100 mM

ethanol to 100 mM

### Stability and Solubility Advice:

Some solutions can be difficult to obtain and can be encouraged by rapid stirring, sonication or gentle warming (in a 45-60°C water bath).

Information concerning product stability, particularly in solution, has rarely been reported and in most cases we can only offer a general guide. Our standard recommendations are:

**SOLIDS:** Provided storage is as stated on the product label and the vial is kept tightly sealed, the product can be stored for up to 6 months from date of receipt.

**SOLUTIONS:** We recommend that stock solutions, once prepared, are stored aliquoted in tightly sealed vials at -20°C or below and used within 1 month. Wherever possible solutions should be made up and used on the same day.

Caution - Not Fully Tested • Research Use Only • Not For Human or Veterinary Use

bio-techne.com

info@bio-techne.com

techsupport@bio-techne.com

North America

Tel: (800) 343 7475

China

info.cn@bio-techne.com

Tel: +86 (21) 52380373

Europe Middle East Africa

Tel: +44 (0)1235 529449

Rest of World

www.tocris.com/distributors

Tel: +1 612 379 2956

# Certificate of Analysis

[www.tocris.com](http://www.tocris.com)
**Product Name:** IP7e**Catalog No.:** 5699**Batch No.:** 1

CAS Number: 500164-74-9

IUPAC Name: 6-[4-[(2-Methoxyethoxy)methyl]phenyl]-5-methyl-3-phenyl-isoxazolo[4,5-c]pyridin-4(5H)-one

## 1. PHYSICAL AND CHEMICAL PROPERTIES

|                                   |                                                               |
|-----------------------------------|---------------------------------------------------------------|
| <b>Batch Molecular Formula:</b>   | C <sub>23</sub> H <sub>22</sub> N <sub>2</sub> O <sub>4</sub> |
| <b>Batch Molecular Weight:</b>    | 390.43                                                        |
| <b>Physical Appearance:</b>       | White solid                                                   |
| <b>Solubility:</b>                | DMSO to 100 mM<br>ethanol to 20 mM with gentle warming        |
| <b>Storage:</b>                   | Store at +4°C                                                 |
| <b>Batch Molecular Structure:</b> |                                                               |

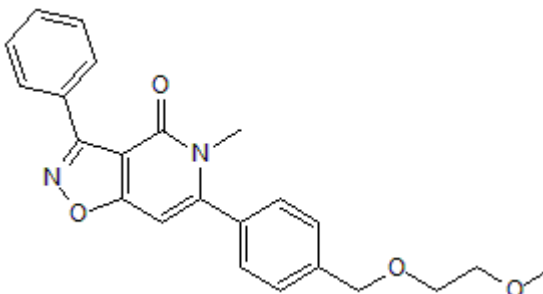

## 2. ANALYTICAL DATA

|                           |                                                             |
|---------------------------|-------------------------------------------------------------|
| <b>TLC:</b>               | R <sub>f</sub> = 0.37 (Ethyl acetate:Petroleum ether [1:1]) |
| <b>HPLC:</b>              | Shows 98.7% purity                                          |
| <b><sup>1</sup>H NMR:</b> | Consistent with structure                                   |
| <b>Mass Spectrum:</b>     | Consistent with structure                                   |
| <b>Microanalysis:</b>     |                                                             |

|             | Carbon | Hydrogen | Nitrogen |
|-------------|--------|----------|----------|
| Theoretical | 70.75  | 5.68     | 7.17     |
| Found       | 71.07  | 5.67     | 7.14     |

Caution - Not Fully Tested • Research Use Only • Not For Human or Veterinary Use

bio-techne.com  
info@bio-techne.com  
techsupport@bio-techne.com

**North America**  
Tel: (800) 343 7475

**China**  
info.cn@bio-techne.com  
Tel: +86 (21) 52380373

**Europe Middle East Africa**  
Tel: +44 (0)1235 529449

**Rest of World**  
www.tocris.com/distributors  
Tel: +1 612 379 2956

## Product Information

[www.tocris.com](http://www.tocris.com)

**Product Name:** IP7e

**Catalog No.:** 5699

**Batch No.:** 1

CAS Number: 500164-74-9

IUPAC Name: 6-[4-[(2-Methoxyethoxy)methyl]phenyl]-5-methyl-3-phenyl-isoxazolo[4,5-c]pyridin-4(5H)-one

### Description:

Potent Nurr1 activator (EC<sub>50</sub> = 3.9 nM). Delays onset and reduces severity of symptoms in mice with experimental autoimmune encephalomyelitis (EAE). Also suppresses NF-κB signaling. Brain penetrant and orally bioavailable.

### Physical and Chemical Properties:

Batch Molecular Formula: C<sub>23</sub>H<sub>22</sub>N<sub>2</sub>O<sub>4</sub>

Batch Molecular Weight: 390.43

Physical Appearance: White solid

**Minimum Purity:** >98%

### Batch Molecular Structure:

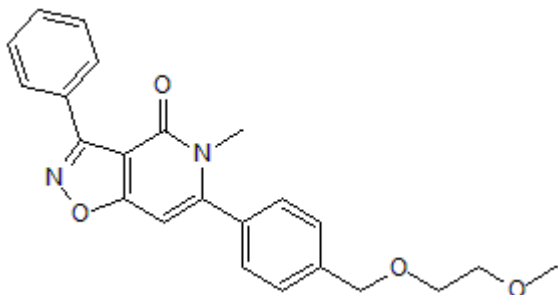

**Storage:** Store at +4°C

### Solubility & Usage Info:

DMSO to 100 mM

ethanol to 20 mM with gentle warming

### Stability and Solubility Advice:

Some solutions can be difficult to obtain and can be encouraged by rapid stirring, sonication or gentle warming (in a 45-60°C water bath).

Information concerning product stability, particularly in solution, has rarely been reported and in most cases we can only offer a general guide. Our standard recommendations are:

**SOLIDS:** Provided storage is as stated on the product label and the vial is kept tightly sealed, the product can be stored for up to 6 months from date of receipt.

**SOLUTIONS:** We recommend that stock solutions, once prepared, are stored aliquoted in tightly sealed vials at -20°C or below and used within 1 month. Wherever possible solutions should be made up and used on the same day.

### References:

**Montarolo et al** (2014) Effects of isoxazolo-pyridinone 7e, a potent activator of the Nurr1 signaling pathway, on experimental autoimmune encephalomyelitis in mice. *PLoS One* **9** e108791. PMID: 25265488.

**Hintermann et al** (2007) Identification of a series of highly potent activators of the Nurr1 signaling pathway. *Bioorg.Med.Chem.Lett.* **17** 193. PMID: 17035009.

Caution - Not Fully Tested • Research Use Only • Not For Human or Veterinary Use

**bio-techne.com**

info@bio-techne.com

techsupport@bio-techne.com

**North America**

Tel: (800) 343 7475

**China**

info.cn@bio-techne.com

Tel: +86 (21) 52380373

**Europe Middle East Africa**

Tel: +44 (0)1235 529449

**Rest of World**

www.tocris.com/distributors

Tel: +1 612 379 2956



S17

# INDOFINE Chemical Company, Inc.

121 Stryker Lane, Bldg. 30, Suite 1 • Hillsborough, NJ 08844 • U.S.A.

Phone: (908) 359-6778 • FAX: (908) 359-1179

website: [www.indofinechemical.com](http://www.indofinechemical.com)

e-mail: [chemical@indofinechemical.com](mailto:chemical@indofinechemical.com)

## CERTIFICATE OF ANALYSIS

Catalog Number: 06-725

Product Name: **ISOALANTOLACTONE**  
(Isohelenin)

CAS Number: [470-17-7]

Lot Number: 1901182

Chemical Formula: C<sub>15</sub>H<sub>20</sub>O<sub>2</sub>

Molecular Weight: 232.32

Appearance: Off-white powder

Loss on Drying: 0.87%

Storage: Store in a cool, dry place

Purity(HPLC): 99.20%

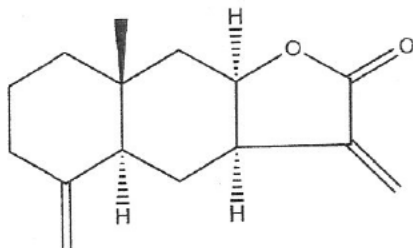

Prepared by:  
*Ramesh Mandadi*  
Ramesh Mandadi  
Director of Operations

Reviewed and approved by:  
*Sujata Moton*  
S. Moton  
VP

**INDOFINE Chemical Company, Inc.**

121 Stryker Lane, Bldg. 30  
Hillsborough, NJ 08844 USA  
Phone: (908) 359-6778; Fax: (908) 359-1179

**HPLC ANALYSIS**

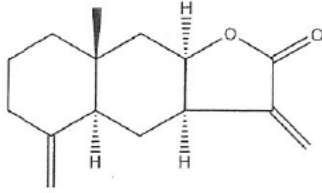

Catalog No.: 06-725  
Product Name: Isoalantolactone  
Lot No.: 1901182

**SAMPLE INFORMATION**

|                   |                  |                     |                  |
|-------------------|------------------|---------------------|------------------|
| Sample Name:      | Isoalantolactone | Acquired By:        | System           |
| Sample Type:      | Standard         | Sample Set Name:    |                  |
| Vial:             | 73               | Acq. Method Set:    | Isoalantolactone |
| Injection #:      | 1                | Processing Method:  | Samples          |
| Injection Volume: | 7.00 ul          | Channel Name:       | 205.0nm          |
| Run Time:         | 25.0 Minutes     | Proc. Chnl. Descr.: | PDA 205.0 nm     |

Auto-Scaled Chromatogram

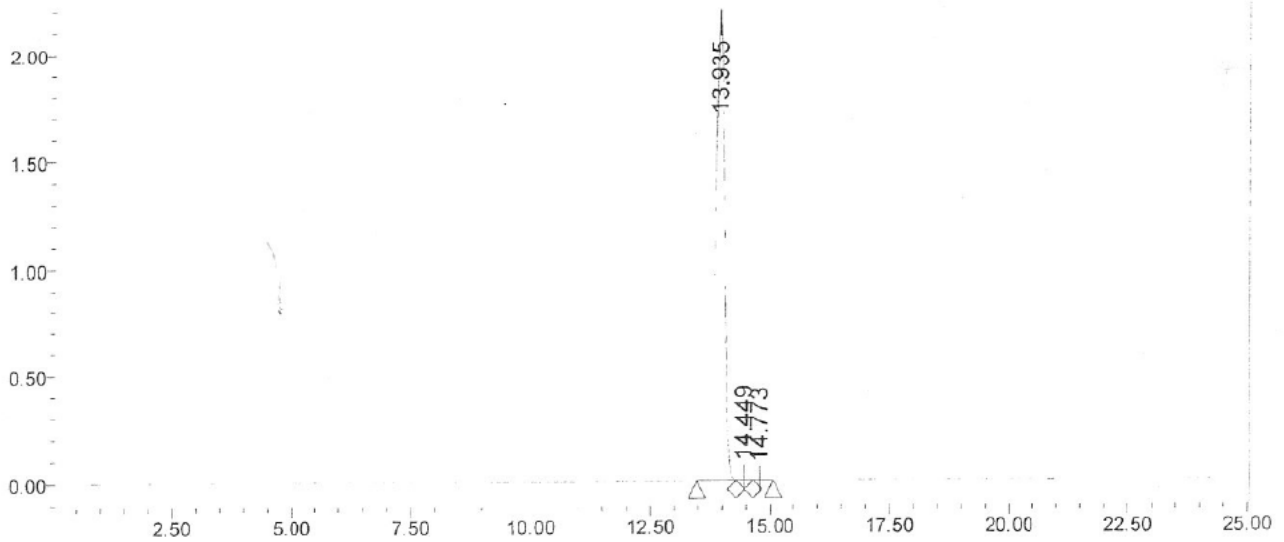

Peak Results

|   | RT     | Area     | % Area | USP Plate Count | USP Resolution |
|---|--------|----------|--------|-----------------|----------------|
| 1 | 13.935 | 27947035 | 99.20  | 27614.77        |                |
| 2 | 14.449 | 172180   | 0.61   | 21003.53        | 1.29           |
| 3 | 14.773 | 51796    | 0.18   | 20460.48        |                |

Prepared by:  
*Ramesh Mandadi*  
Ramesh Mandadi  
Director of Operations

Reviewed and Approved by:  
*Sujata Moton*  
Sujata Moton  
VP

Certificate of Analysis

## Nur77 LBD Antagonist, TMPA - Calbiochem

Batch Number: 3013545  
 Material Number: 492910-10MG  
 Molecular Formula:  $C_{21}H_{32}O_6$   
 Molecular Weight: 380.5

Quality Release Date: 17-JAN-2018  
 Recommended Retest Date: 22-APR-2023

## Analytical Data

| Test                | Tolerance | Result                                                    |
|---------------------|-----------|-----------------------------------------------------------|
| Solubility:         |           | DMSO (100 mg/ml). Use only fresh DMSO for reconstitution. |
| Color:              |           | Off-white                                                 |
| Form:               |           | Solid                                                     |
| Purity by HPLC:     | ≥97.00 %  | 97.62 %                                                   |
| NMR:                |           | Conforms                                                  |
| LC-MS:              |           | Conforms                                                  |
| Carbon:             | ≥0.00 %   | 66.01 %                                                   |
| Hydrogen:           | ≥0.00 %   | 8.87 %                                                    |
| Water by CHN (mol): | ≥0.0 %    | 0.0 %                                                     |

Storage and Handling: +2°C to +8°C

This lot conforms to specifications established by EMD Millipore Corporation for this product.

*Suzanne Lee*

10 December 2018

Quality Control/ Assurance Signature

Date

Prices and availability are subject to change. ©Copyright 2018 EMD Millipore Corporation, an affiliate of Merck KGaA, Darmstadt, Germany. All rights reserved. Each product is sold with a limited warranty, which is provided with each purchase. Each product is intended to be used for research purposes only. It is not to be used for drug or diagnostic purposes, nor is it intended for human use. EMD Millipore products may not be resold, modified for resale, or used to manufacture commercial products without written approval of EMD Millipore Corporation.

EMD Millipore Corporation | 28820 Single Oak Dr., Temecula, CA 92590

TechnicalSupportNA+1-800-221-1975|email:www.millipore.com/techservices|www.calbiochem.com  
 Technical Support All Other Countries - Contact Your Local Office

FOR RESEARCH USE ONLY. Not for use in diagnostic procedures. Not for human or animal consumption. Purchase of this product does not include any right to resell or transfer, either as a stand-alone product or as a component of another product. Any use of this Product for purpose other than research is strictly prohibited.

Calbiochem and all other trademarks, unless specifically identified as belonging to a third party, are owned by Merck KGaA, Darmstadt, Germany

## HEK293T

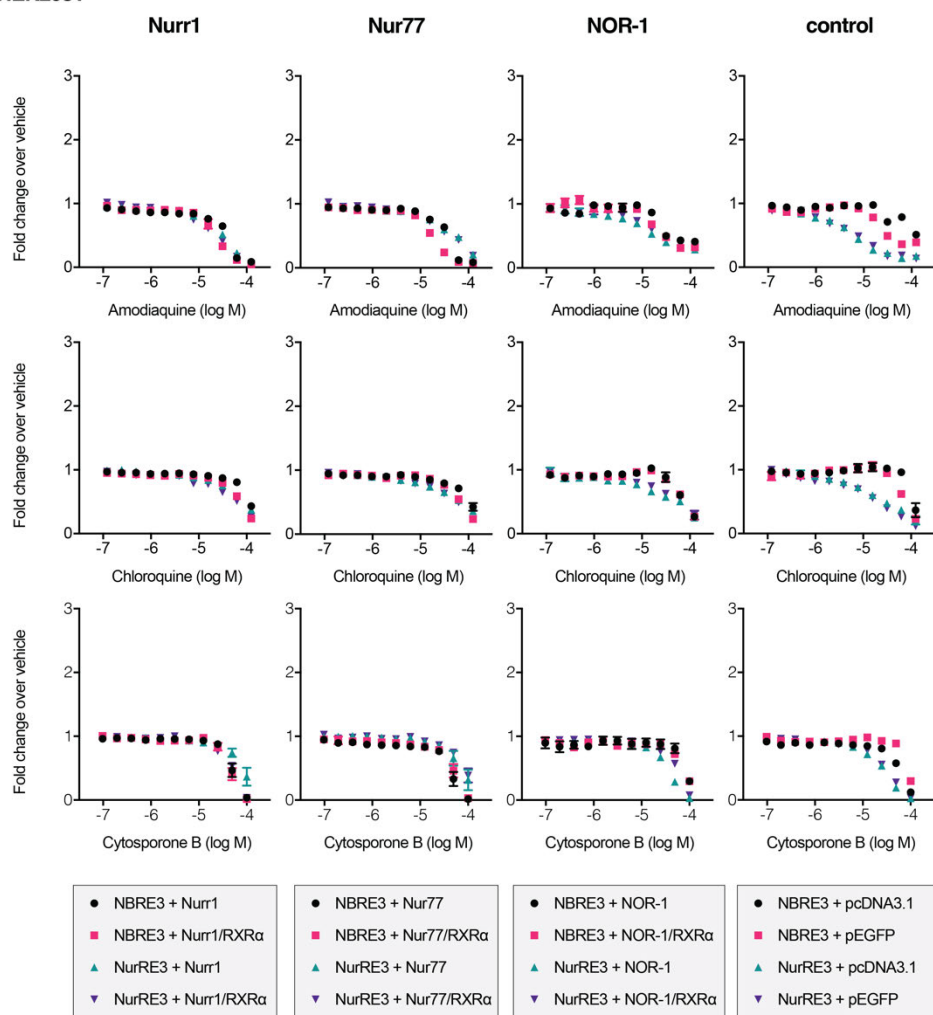

**Figure S1.** Effect of the Nurr1-binding ligands on transcription in HEK293T cells transfected with full-length NR4As (Nurr1, Nur77, or NOR-1) or empty control plasmid without a NR4A insert using using NBRE3-luc or NurRE3-luc reporters with or without cotransfection of full-length RXR $\alpha$ . Data represent mean  $\pm$  s.e.m. (n=4).

## PC12

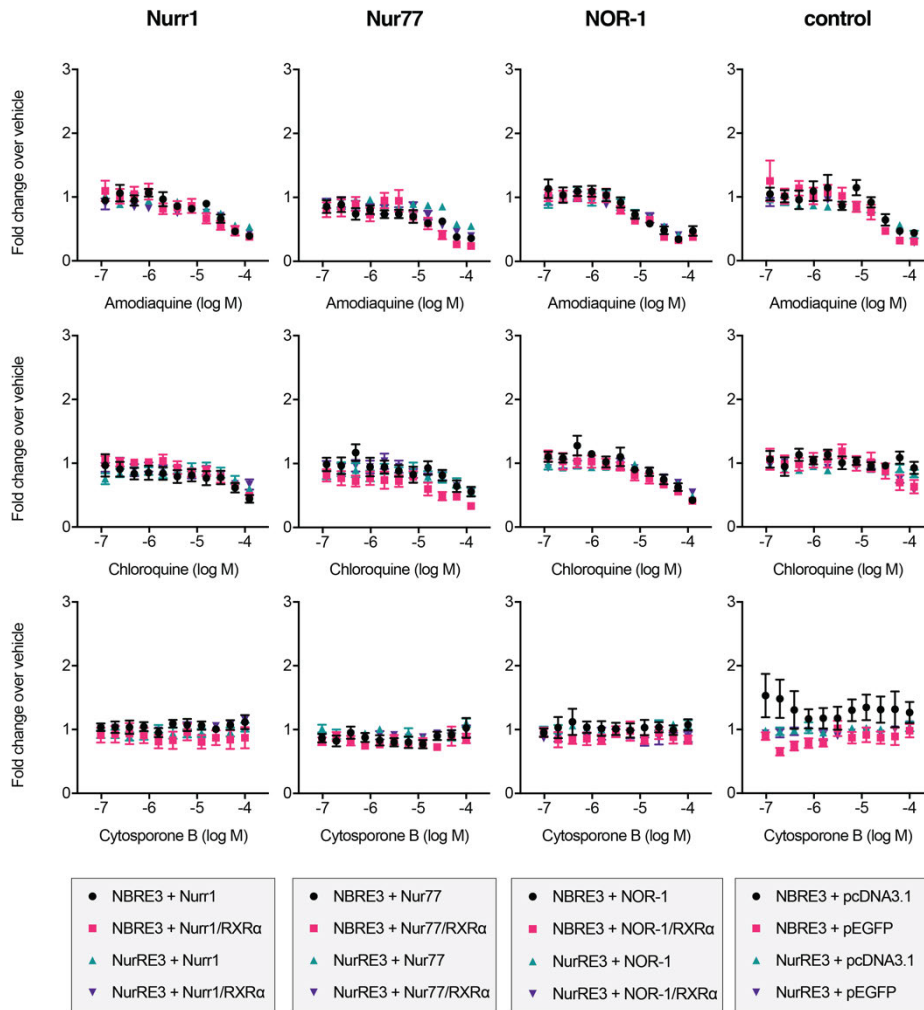

**Figure S2.** Effect of the Nurr1-binding ligands on transcription in PC12 cells transfected with full-length NR4As (Nurr1, Nur77, or NOR-1) or empty control plasmid without a NR4A insert using using NBRE3-luc or NurRE3-luc reporters with or without cotransfection of full-length RXR $\alpha$ . Data represent mean  $\pm$  s.e.m. (n=4).

## SK-N-BE(2)-C

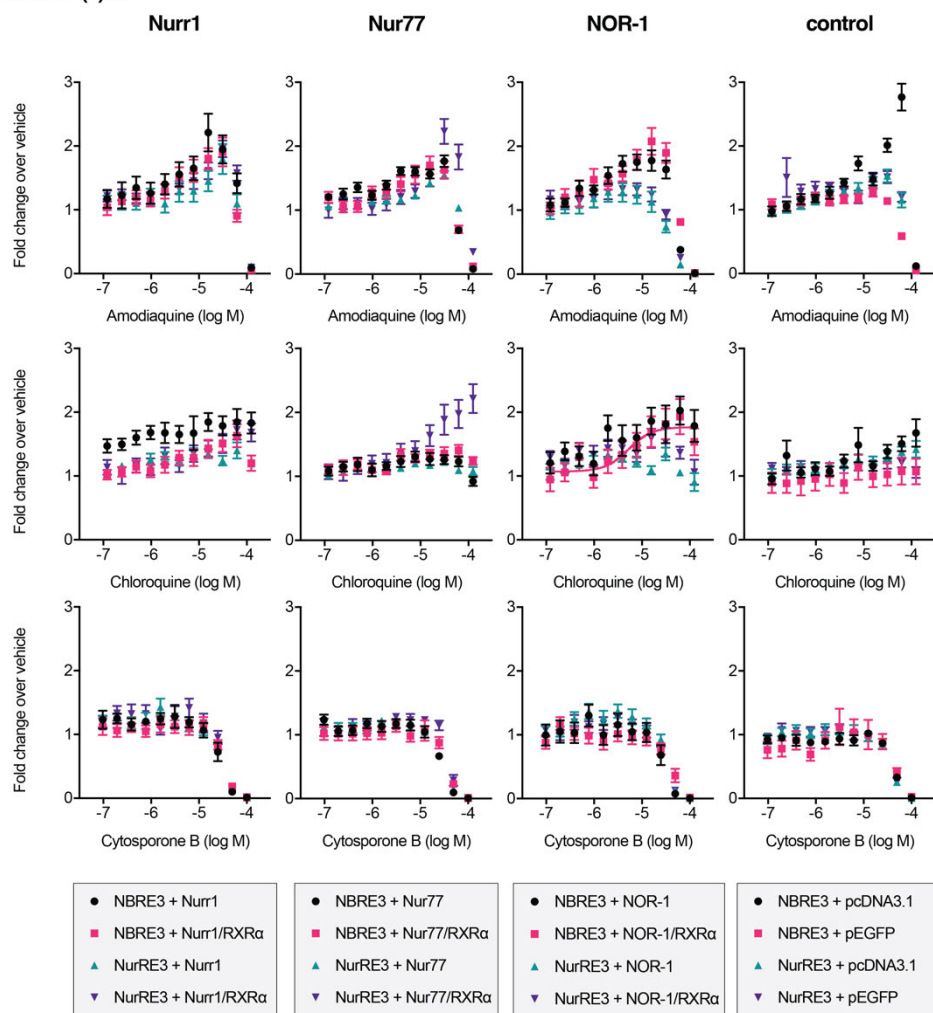

**Figure S3.** Effect of the Nurr1-binding ligands on transcription in SK-N-BE(2)-C cells transfected with full-length NR4As (Nurr1, Nur77, or NOR-1) or empty control plasmid without a NR4A insert using using NBRE3-luc or NurRE3-luc reporters with or without cotransfection of full-length RXRα. Data represent mean  $\pm$  s.e.m. (n=4).
